# Supplementary material for: Cre/CysC ratio may predict muscle composition and is associated with glucose disposal ability and macrovascular disease in patients with type 2 diabetes
Source: PubMed Central journal article supplement — BMJ Open Diabetes Res Care. 2021 Nov 3;9(2):e002430. doi: 10.1136/bmjdrc-2021-002430 (PMC8572382; doi:10.1136/bmjdrc-2021-002430), 2021-11-03
Supplement: bmjdrc-2021-002430supp001.pdf [file bmjdrc-2021-002430supp001.pdf]

## Supplemental materials

### **The Cre/CysC ratio can predict muscle composition and is associated with glucose disposal ability and macrovascular disease in patients with type 2 diabetes**

Qing Yang,<sup>1\*</sup> Mei Zhang,<sup>2\*</sup> Peng Sun,<sup>1</sup> Yanying Li,<sup>2</sup> Huichao Xu,<sup>1</sup> Kejun Wang,<sup>1</sup> Hongshan Shen,<sup>1</sup> Bo Ban<sup>2</sup>, Fupeng Liu<sup>2</sup>

1. Department of Nutrition, Affiliated Hospital of Jining Medical University, Jining, Shandong, China.
2. Department of Endocrinology, Affiliated Hospital of Jining Medical University, Jining, Shandong, China.

## Method of the 100 g steamed bun test

Islet  $\beta$ -cell function was assessed using the 100 g steamed bun test. The test was performed between 7:30 and 10:30 a.m. after an overnight fast of at least 12 h. The levels of serum blood glucose and C-peptides were measured during fasting and 30, 60, 120, and 180 min after eating 100 g steamed bread within 10 mins.

## Diagnostic criteria of diabetic complications

**Diabetic peripheral neuropathy:** Diabetic peripheral neuropathy refers to peripheral nerve dysfunction-related symptoms or signs in diabetic patients that cannot be attributed to other causes. Asymptomatic patients must be diagnosed by physical examination or neuroelectrophysiological examination.

**Diabetic nephropathy:** Diabetic nephropathy is diagnosed by elevated urinary albumin excretion and reduced eGFR in the absence of other primary causes of kidney damage. Albuminuria was defined as an albumin/creatinine ratio of 30 mg/g or higher. The eGFR was calculated using the Modification of Diet in Renal Disease Study equation or the Cockcroft–Gault formula and regarded as reduced if the value was less than 90 (ml/min/1.73 m<sup>2</sup>).

**Diabetic retinopathy:** Diabetic retinopathy was diagnosed according to the international clinical grading standard for diabetic retinopathy by an ophthalmologist who specializes in diabetic retinopathy.

**Lower-extremity arterial disease:** Lower-extremity arterial disease was diagnosed if the patients had a resting ABI  $\leq 0.90$ . For patients who experienced discomfort upon moving and had a resting ABI  $\geq 0.90$ , lower-extremity arterial disease was also diagnosed if the ABI decreased by 15 – 20% after a treadmill test.

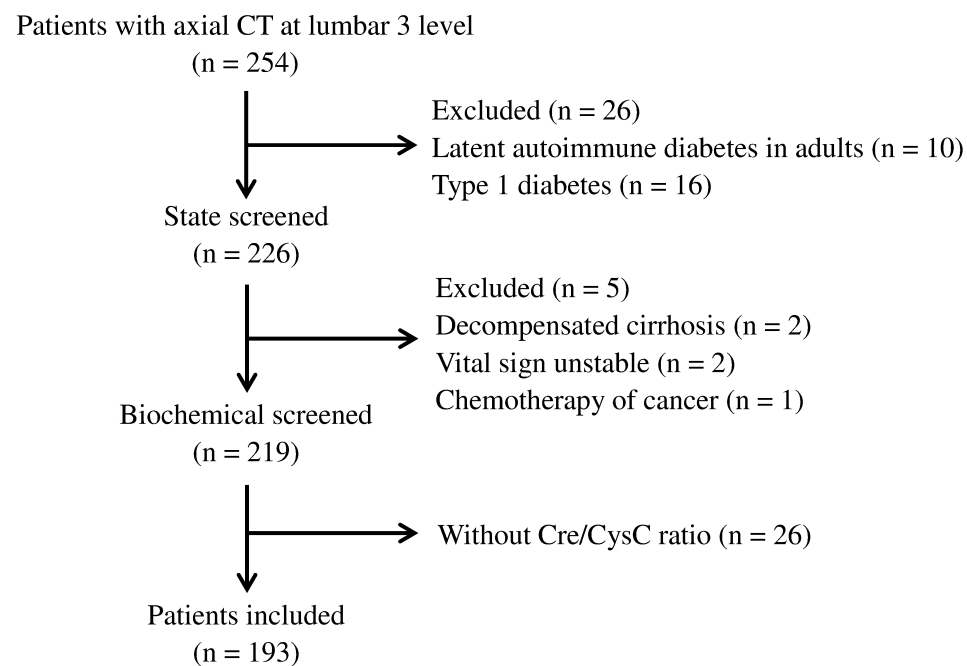

**Supplemental figure 1. The screening process for patients enrolled in this study.**

Supplemental table 1. Correlations between skeletal composition and clinical factors.

| Variable                 | SMI                |                   |                    | MMA                |                   |                    |
|--------------------------|--------------------|-------------------|--------------------|--------------------|-------------------|--------------------|
|                          | Total<br>(n = 193) | Male<br>(n = 114) | Female<br>(n = 79) | Total<br>(n = 193) | Male<br>(n = 114) | Female<br>(n = 79) |
| Age (years)              | -0.288***          | -0.226*           | -0.119             | -0.481***          | -0.416***         | -0.492***          |
| Duration (months)        | -0.134             | -0.175            | 0.063              | -0.234**           | -0.165            | -0.251             |
| BMI (kg/m <sup>2</sup> ) | 0.505***           | 0.594***          | 0.402***           | -0.178*            | -0.117            | -0.435***          |
| WHR                      | 0.286***           | 0.098             | 0.275*             | -0.149*            | -0.214            | -0.302**           |
| Creatinine (mg/L)        | 0.382***           | 0.153             | -0.032             | 0.132              | 0.007             | -0.143             |
| Cystatin C (mg/L)        | -0.046             | -0.163            | -0.154             | -0.234**           | -0.287**          | -0.310**           |
| Cre/CysC                 | 0.375***           | 0.234*            | 0.131              | 0.378***           | 0.337***          | 0.223*             |
| Albumin (g/L)            | 0.250              | 0.273**           | 0.180              | 0.163*             | 0.101             | 0.167              |
| BUN (mmol/L)             | 0.095              | 0.010             | 0.092              | 0.051              | 0.011             | 0.025              |
| TG (mmol/L)              | 0.144*             | 0.058             | 0.123              | 0.171*             | 0.159             | 0.102              |
| TCH (mmol/L)             | -0.099             | -0.080            | -0.037             | -0.067             | 0.122             | -0.150             |
| HDL (mmol/L)             | -0.248**           | -0.038            | -0.088             | -0.165*            | -0.087            | -0.037             |
| LDL (mmol/L)             | -0.139             | -0.040            | -0.034             | -0.156*            | 0.040             | -0.227*            |
| HbA1c (%)                | 0.061              | 0.160             | 0.158              | 0.016              | 0.158             | -0.079             |
| FBG (mmol/L)             | -0.172*            | -0.221*           | 0.093              | -0.083             | -0.055            | 0.009              |
| FCP (ng/ml)              | 0.185*             | 0.055             | 0.148              | 0.047              | 0.030             | -0.084             |
| HOMA2%B                  | 0.284***           | 0.206*            | 0.121              | 0.082              | -0.014            | 0.001              |
| HOMA2%S                  | -0.223**           | -0.192            | -0.151             | -0.016             | -0.141            | 0.213              |
| HOMA2 IR                 | 0.126              | 0.021             | 0.181              | 0.016              | 0.020             | -0.061             |
| Hypertension             | (-1.20, 3.76)      | (-0.29, 4.73)     | (-3.72, 1.81)      | (-3.86, -0.01)     | (-4.46, -0.02)*   | (-4.98, 1.28)      |
| CV disease               | (-5.31, 0.02)      | (-2.96, 2.87)     | (-4.87, 0.72)      | (-5.78, -1.36)**   | (-5.19, -0.20)*   | (-6.32, -0.02)*    |
| DPN                      | (-2.14, 3.67)      | (-2.95, 3.02)     | (-1.54, 4.86)      | (-3.90, 0.64)      | (-4.34, 0.83)     | (-5.16, 2.14)      |

|                                        |               |               |                 |                 |                 |               |
|----------------------------------------|---------------|---------------|-----------------|-----------------|-----------------|---------------|
| LEAD                                   | (-3.14, 1.85) | (-1.16, 3.92) | (-5.49, -0.05)* | (-3.19, 0.71)   | (-3.38, 1.28)   | (-4.33, 2.01) |
| DN                                     | (-1.41, 3.60) | (0.27, 5.31)* | (-3.21, 2.33)   | (-4.20, -0.33)* | (-5.19, -0.50)* | (-4.23, 2.06) |
| DR                                     | (-4.07, 1.83) | (-4.43, 1.88) | (-1.77, 4.43)   | (-2.96, 1.66)   | (-4.00, 1.52)   | (-2.54, 4.54) |
| SMI (cm <sup>2</sup> /m <sup>2</sup> ) | 1.000         | 1.000         | 1.000           | 0.409***        | 0.276**         | 0.208         |
| MMA (HU)                               | 0.409***      | 0.276**       | 0.208           | 1.000           | 1.000           | 1.000         |
| FMI (cm <sup>2</sup> /m <sup>2</sup> ) | 0.101         | 0.349***      | 0.220           | -0.481***       | -0.355***       | -0.567***     |

Correlations are shown with the coefficient r or 95% CI of the mean difference between the patients with complications and without. Abbreviations: Cre/CysC, creatinine-to-cystatin C ratio; BUN, blood urea nitrogen; TG, triglycerides; TCH, total cholesterol; HDL, high-density lipoproteins; LDL, low-density lipoproteins; FBG, fasting blood glucose; FCP, fasting C-peptide; CV, cardiovascular; DPN, diabetic peripheral neuropathy; LEAD, lower-extremity arterial disease; DN, diabetic nephropathy; DR, diabetic retinopathy; SMI, skeletal muscle index; MMA, mean skeletal muscle attenuation; FMI, fat mass index. \*, p < 0.05; \*\*, p < 0.01; \*\*\*, p < 0.001.

**Supplemental table 2. Multiple stepwise linear regression analysis of factors associated with the SMI and MMA in males and females.**

| Variable   | Male                 |         | Variables  | Female               |         |
|------------|----------------------|---------|------------|----------------------|---------|
|            | Beta (95% CI)        | p value |            | Beta (95% CI)        | p value |
| <b>SMI</b> |                      |         | <b>SMI</b> |                      |         |
| BMI        | 1.28 (0.95, 1.61)    | <0.001  | BMI        | 0.78 (0.43,1.12)     | <0.001  |
| Age        | -0.10 (-0.18, -0.01) | 0.022   | Age        | -0.15 (-0.28, 0.03)  | 0.019   |
| <b>MMA</b> |                      |         | <b>MMA</b> |                      |         |
| Age        | -0.17 (-0.25, -0.09) | <0.001  | Age        | -0.28 (-0.40, 0.15)  | <0.001  |
| DN         | -2.67 (-4.62, -0.72) | 0.008   | BMI        | -0.66 (-1.00, 0.31)  | <0.001  |
| Cre/CysC   | 0.60 (0.11, 1.09)    | 0.016   | LDL        | -2.17 (-3.55, -0.78) | 0.003   |
|            |                      |         | Albumin    | 0.26 (0.01, 0.51)    | 0.040   |

Adopted factors: age, BMI, WHR, Cre/CysC, creatinine, albumin, high-density lipoproteins, HOMA2%B, HOMA2%S, fasting blood glucose and fasting C-peptide for the SMI; age, duration, BMI, WHR, Cre/CysC, cystatin C, albumin, triglycerides, high-density lipoproteins, low-density lipoproteins, hypertension, cardiovascular disease and diabetic nephropathy for the MMA.  $R^2 = 0.382$  for the SMI and  $0.270$  for the MMA in males.  $R^2 = 0.220$  for the SMI and  $0.443$  for the MMA in females. Cre/CysC, creatinine-to-cystatin C ratio; SMI, skeletal muscle index; MMA, mean skeletal muscle attenuation; DN, diabetic nephropathy; LDL, low-density lipoprotein.

**Supplemental table 3. Multiple stepwise linear regression analysis of factors associated with glucose at 120 min and 180 min.**

| Variable       | Beta (95% CI)        | p value |
|----------------|----------------------|---------|
| <b>120 min</b> |                      |         |
| HOMA2%B        | -0.04 (-0.05, -0.02) | <0.001  |
| Cre/CysC       | -0.46 (-0.69, -0.23) | <0.001  |
| BMI            | -0.18 (-0.31, -0.05) | 0.008   |
| Duration       | 0.01 (0.00, 0.01)    | 0.014   |
| HbA1c          | 0.30 (0.07, 0.54)    | 0.012   |
| Creatinine     | 0.27(0.01, 0.53)     | 0.042   |
| <b>180 min</b> |                      |         |
| HOMA2%B        | -0.05 (-0.06, -0.04) | <0.001  |
| Cre/CysC       | -0.49 (-0.74, -0.25) | <0.001  |
| Sex            | -1.90 (-2.92, 0.87)  | <0.001  |
| Creatinine     | 0.41 (0.12, 0.70)    | 0.006   |
| HbA1c          | 0.40 (0.15, 0.65)    | 0.002   |
| Duration       | 0.01 (0.00, 0.02)    | 0.013   |

Adopted factors: sex, age, duration, BMI, diabetic peripheral neuropathy, diabetic retinopathy, Cre/CysC, creatinine, albumin, total cholesterol, low-density lipoproteins, HbA1c, HOMA2%B and skeletal muscle index.  $R^2 = 0.462$  for 120 min and 0.552 for 180 min glucose levels.
